1       **Single-cell Transcriptome Mapping Identifies Common and Cell-type Specific Genes**  
2                   **Affected by Acute Delta9-tetrahydrocannabinol in Humans**

3   Ying Hu<sup>1</sup>, Mohini Ranganathan<sup>2,3</sup>, Chang Shu<sup>2,3</sup>, Xiaoyu Liang<sup>2,3</sup>, Suhas Ganesh<sup>2,3</sup>, Chunhua  
4   Yan<sup>1</sup>, Xinyu Zhang<sup>2,3</sup>, Bradley E Aouizerat<sup>4,5</sup>, John H Krystal<sup>2,3</sup>, Deepak C. D'Souza<sup>2,3</sup>, Ke Xu  
5   <sup>2,3</sup>

6   1. Center for Biomedical Information and Information Technology, National Cancer Institute,  
7   MD, U.S.A.

8   2. Department of Psychiatry, Yale School of Medicine, New Haven, CT, 06516

9   3. Connecticut Veteran Healthcare System, West Haven, CT, 06515

10   4. Bluestone Center for Clinical Research, College of Dentistry, New York University, NY, 10010

11   5. Department of Oral and Maxillofacial Surgery, College of Dentistry, New York University, NY,  
12   10010

13  
14   Please direct all correspondence to:

15   Ke Xu, MD, PhD

16   Associate Professor of Psychiatry

17   Yale School of Medicine

18   Email: ke.xu@yale.edu

19   Telephone: 203-932-5711x7430

20

21

22

23

24 **Abstract**

25 Delta 9-tetrahydrocannabinol (THC), the principal psychoactive constituent of cannabis, is also  
26 known to modulate immune response in peripheral cells. The mechanisms of THC's effects on  
27 gene expression in human immune cells remains poorly understood. Combining a within-subject  
28 design with single cell transcriptome mapping, we report that administration of THC acutely  
29 alters gene expression in 15,973 human blood immune cells. Controlled for high inter-individual  
30 transcriptomic variability, we identified 294 transcriptome-wide significant genes among eight  
31 cell types including 69 common genes and 225 cell-type specific genes affected by acute THC  
32 administration, including those genes involving not only in immune response, cytokine  
33 production, but signal transduction, and cell proliferation and apoptosis. We revealed distinct  
34 transcriptomic sub-clusters affected by THC in major immune cell types where THC perturbed  
35 cell type-specific intracellular gene expression correlations. Gene set enrichment analysis  
36 further supports the findings of THC's common and cell-type specific effects on immune  
37 response and cell toxicity. We found that THC alters the correlation of cannabinoid receptor  
38 gene, *CNR2*, with other genes in B cells, in which *CNR2* showed the highest level of  
39 expression. This comprehensive cell-specific transcriptomic profiling identified novel genes  
40 regulated by THC and provides important insights into THC's acute effects on immune function  
41 that may have important medical implications.

42 **Key words:** Delta-9-tetrahydrocannabinol, single cell transcriptome, peripheral blood  
43 mononuclear cells, differential gene expression, gene set enrichment analysis, gene co-  
44 expression

45

46

47

48 **Main**

49 With the increasing rates of cannabis use for recreational and medical purposes, it is important  
50 to address a gap in our understanding of its impact on immune and inflammatory functions.<sup>1,2</sup>

51 Delta-9-tetrahydrocannabinol (THC), the principal psychoactive constituent of cannabis,  
52 powerfully modulates immune function in peripheral cells,<sup>3</sup> in part, through activating  
53 cannabinoid receptor 2 (CBR2).<sup>1,3-6</sup> *In vitro* studies of cannabis exposure, which contains over  
54 450 compounds, show that it modulates immune function,<sup>7-9</sup> changes cytokine production,<sup>8,10,11</sup>  
55 inhibits cell proliferation,<sup>2</sup> and induces apoptosis.<sup>12,13</sup> However, little is known about the  
56 mechanisms of *in vivo* THC exposure on the transcriptomes of distinct types of peripheral blood  
57 mononuclear cells (PBMCs) in humans.

58 Single cell RNA-seq (scRNA-seq) offers an unprecedented resolution to detect drug effects on  
59 cell-specific gene expression in an unbiased fashion<sup>14,15</sup> and enables the evaluation of  
60 molecular aspects of immune cell heterogeneity.<sup>16</sup> Few studies have applied scRNA-seq to  
61 detect differentially expressed genes (DEGs) induced by drug exposure, and none have  
62 evaluated the effects of THC in humans. This limitation is due mostly to high inter-individual  
63 transcriptomic variability and types of cells that confound the assessment of the impact of  
64 environmental factors. Most recently, a scRNA-seq study identified a large number of common  
65 and cell-type specific DEGs for Alzheimer disease, suggesting the improvement of analytical  
66 methods to overcome the challenge of high transcriptomic variability.<sup>17</sup> Here, we report a first  
67 sc-RNA seq study using within-subject combined with linear mixed model (LMM) analysis to  
68 detect genes affected by THC at single cell resolution.

69 In this study, samples of blood were drawn and PMBCs extracted prior to (pre-THC) and 70  
70 minutes following (post-THC) a single 0.03mg/kg intravenous dose of THC in two healthy  
71 individuals. The selected THC dose reliably produces effects consistent with cannabis  
72 intoxication.<sup>18,19</sup> The timing of the blood sampling was selected to maximize the likelihood of

73 detecting changes in drug-induced gene expression. A battery of subjective and cognitive  
74 assessments were administered to capture the effects and safety of THC.<sup>18,20,21</sup> We profiled the  
75 four PBMC samples (two pre-THC and two post-THC) on the 10X Genomics platform.<sup>22</sup> Quality  
76 control processing yielded a total of 15,973 cells and 21,430 genes for analyses (**Figure 1a**).

77 Cells (n=15,973) clustered by participant, not by experimental condition (**Figure 1b**), indicating  
78 that transcriptomic variability between individuals is greater than variability introduced by a  
79 single THC dose. We then removed batch effects using Seurat<sup>23</sup> and surrogate variable  
80 analysis<sup>24</sup> methods and all 15,973 cells clustered into 21 groups (**Figure 1c, Figure S1**). To  
81 assign cell clusters to cell types, we used a generalized linear model (GLM)-based cell mapping  
82 approach with cell-type “marker” genes curated from the literature (see Methods). Briefly, we  
83 selected a reference gene panel based on known cell type-specific gene profiles<sup>22,25</sup>, then used  
84 GLM to test the association of gene expression in each cell with the known marker  
85 genes (Figure S2, Table S1). Each cluster was assigned a cell type based on the highest  
86 percentage of significant cells (**Table S2**). Expression of marker genes differed significantly in  
87 cell types (**Figures 1d, S2**). This approach unambiguously deconvoluted the 15,973 cells  
88 among 21 clusters into eight cell subtypes: CD4+ T-cells (34.6%), IL7RCD4+ T-cells (8.4%),  
89 CD8+ T-cells (17.4%), B cells (13.2%), natural killer (NK) cells (12.3%), CD14+ monocytes  
90 (10.0%), FCGR3A monocytes (3.9%), and dendritic cells (DC) (0.3%) (**Figure 1e**). The  
91 proportions of each cell type among the participant samples pre- and post-THC infusion are  
92 presented in **Figure 1f** and **Table S3**. This robust cell type identification allowed us to examine  
93 THC-regulated gene expression in each cell type.

94 We next applied LMM to detect individual genes affected by THC infusion, with participant  
95 included as a random variable to limit confounding effects from an individual’s genomic  
96 background. We identified 294 transcriptome-wide significant genes in eight cell types changed  
97 by THC infusion (false discovery rate, FDR<0.05) (**Figure 2a**). DCs and FCGR3A monocytes

98 were excluded from further analyses because no gene reached transcriptome-wide significance  
99 in DCs and both cell types had low frequencies. Among the 294 DEGs, 69 were observed in at  
100 least two cell types while 225 were significant in unique cell types (**Figure 2b**; **Table S4-S11**).  
101 Overall, THC infusion resulted in more upregulated genes than downregulated genes.

102 We sought to identify THC-regulated genes common across the six common cell types. We  
103 found 28 DEG in at least three cell types (**Figure 2c**). The majority of the DEG showed  
104 consistent directions of regulation by THC in different cell types; only three genes displayed  
105 opposing regulation in CD14+ monocytes compared to other cell types (*TMSB4X*, *JUNB*,  
106 *TXNIP*). A group of THC-regulated genes have functions in the domains of immune response  
107 and inflammatory process. For example, expression of *S100A9* and *S100A8*, which play  
108 prominent roles in the regulation of proinflammatory processes and immune response<sup>26-28</sup>,  
109 decreased in response to THC infusion in five cell types. A major HIV-1 suppressive gene,  
110 *CCL4*, displayed increased expression after THC infusion. THC decreased expression of *GNLY*  
111 that is involved in activating antigen presentation.<sup>29</sup> The altered expression of genes involved in  
112 humoral immunity were also observed (*IGLC2*, *IGKC*). Changes in expression of these genes  
113 suggest that THC activates the adaptive immune system shortly after administration, in a line  
114 with findings showing an immunomodulatory effect that is more complicated than solely  
115 immunosuppression.<sup>3,8,30-33</sup>

116 Among the 28 DEG shared in at least three cell types, a subset supports previous findings that  
117 acute THC exposure inhibits cell proliferation and induces apoptosis. Genes responsible for cell  
118 death were upregulated (*BTG1*,<sup>34</sup> *DDIT4*,<sup>35</sup> *GZMB*) and genes involving in cell growth and  
119 differentiation were down-regulated (*TMSB10*<sup>36</sup>, *RPS21*,<sup>37</sup> *RPL41*<sup>38</sup> by THC exposure. The  
120 alteration of these genes in distinct cell types may indicate potentially deleterious effects of THC  
121 on cell differentiation and survival.

122 Given that the majority of THC-regulated DEG are unique to each cell type, we then focused on  
123 DEG and co-expression networks in each cell type. DEG were determined both in individual  
124 clusters in each cell type and among all cells in each cell type. We leveraged gene-gene  
125 relationships cataloged in the Kyoto Encyclopedia of Genes and Genomes (KEGG) database<sup>39</sup>  
126 and constructed gene networks independently in pre- and post-THC samples in each cell type  
127 (FDR<0.05). Hub genes in each cell-type based network were defined as a node (gene) with at  
128 least four edges (gene links) in at least one condition (pre-, post-THC, or both). We then  
129 performed Gene Ontology (GO) term enrichment analysis for each cell-type based co-  
130 expression network (FDR<0.05).

131 In CD4+ T-cells, significant DEG are involved in cytotoxic T-cell activation (*IL7R*<sup>40</sup>), histone  
132 modification (*H3F3B*<sup>41</sup>), and transcriptional regulation (*MYC*<sup>42</sup>). We observed three cell sub-  
133 groups (cluster 3, 8, and 16; **Figure 3a**; **Table S12**). Cluster 8 showed a distinct DEG pattern  
134 from clusters 3 and 16. Co-expression analysis identified 40 nodes with 33 edges enriched on  
135 14 GO terms including immune response, cell surface receptor signaling pathway, cellular  
136 response to stimulus. Two hub genes in the network, *CCR7* (significantly connected with *CCR*  
137 [*CCR2*, *CCR6*, *CCR10*] and *CXCR* [*CXCR3*, *CXCR4*] family genes) and *HLA-A* (significantly  
138 correlated with three other *HLA* genes [*HLA-B*, *HLA-E*, *HLA-F*], were significantly affected by  
139 THC infusion (**Figure 3b**), showing that acute THC exposure perturbed gene-gene relationships  
140 in CD4+ T-cells and appears to increase the gene connectivity involving cell-mediated immunity.

141 In CD8+ T-cells, we identified 18 unique DEGs that involved in immune response and  
142 inflammation in response to THC (e.g. *IL32*,<sup>43</sup> *SOCS1*,<sup>44</sup> and *IRF1*<sup>45</sup>). Of note, THC infusion  
143 resulted in the differential expression of *CXCR4*, *TSC22D3*, *DDIT4*, *BTG1*, *JUN* in cluster 18 of  
144 CD8+ T-cells (**Figure 3c**), suggesting that cells in cluster 18 may function differently in response  
145 to THC as compared to the other CD8+ T-cell sub-group. The gene network included 35 nodes  
146 that enriched on 12 GO terms (e.g., immune system process), similar to the CD4+ T-cell

147 network. One hub gene, *HLA-A* (strongly correlated with *HLA-B* and *HLA-C* in pre-and post-  
148 THC samples), was observed in the network (**Figure 3d; Table S13**).

149 In B cells, genes unique to B cells were observed that are involved in B cell maturation  
150 (*VPREB3*<sup>46</sup>), MHC function (*HLA-DQA1*, *HLA-DQA2*), calcium signaling (*CALM2*),<sup>47</sup> Toll-like  
151 receptors (*CD180*),<sup>48</sup> and response to environmental stress via activating MAP kinase  
152 MAPK1/ERK2 (*DUSP1*).<sup>49</sup> Consistent with *in vitro* findings, we found that acute THC exposure  
153 reduced expression of *BCL2* in B cells.<sup>40</sup> The majority of DEG originated from cluster 14 (**Figure**  
154 **3e; Table S14**), with only 8 DEGs from cluster 12, which were all upregulated by THC. In the  
155 co-expression network, we found 34 nodes with 28 edges (**Figure 3f**) enriched on GO pathways  
156 including MHC protein complex, immune response, peptide antigen binding. Four hub genes  
157 were identified that differed in response to THC (*HLA-A* and *HLA-BQA1*) *HLA-DPA1* [became  
158 more strongly correlated with *HLA-DQB1* post-THC], *ANX1* [connected to *CXCL1*, *CXCR4*,  
159 *XOL2* in pre-but not post-THC samples]). Notably, two B cell marker genes (*BLNK*, *CD79B*)  
160 were correlated in post- but not pre-THC samples.

161 In NK cells, which is defined by one cluster, many DEGs (e.g. *DDIT4*, *CCL4*, *BTG1 ID2*) are  
162 involved in immune response and cell proliferation. One DEG unique to NK cells, *CD53*, was  
163 downregulated by THC. Genes in the NK cell network (17 nodes and 12 edges; **Figure 3g**)  
164 were enriched on 17 pathways including chemokine-mediated signaling pathway, inflammatory  
165 response, and chemokine receptor activity. Notably, *KLRC1* regulates specific humoral and cell-  
166 mediated immunity and is implicated in the recognition of the MHC class I HLA molecules in NK  
167 cells and was correlated with *HLA-C*, which increased in post-THC samples. No hub genes  
168 were observed.

169 In CD14+ monocytes, which were composed of two subgroups (cluster 10 and 17; **Figure 3h**;  
170 **Table S15**), THC infusion resulted in unique 44 DEGs, including genes regulating cell fate (e.g.  
171 *MCL1*, *FOSB*, *MYADM*). Genes in the CD14+ monocyte network (18 nodes and 13 edges;

172 **Figure 3i**) were enriched on pathways including MHC class II protein complex, antigen  
173 processing, immune response, and cellular response to interferon-gamma. One hub gene, *HLA-*  
174 *DQB1*, was observed.

175 These observations from individual gene and co-expression networks in different cell types  
176 suggest a diverse functional response to acute THC exposure in heterogenous immune cells.  
177 Significant pathways for all co-expression networks in each major cell type are presented in  
178 Table **S16-S21**.

179 We subsequently performed a cell type-based gene set enrichment analysis (GSEA) using  
180 DEGs. We found 39 significant KEGG pathways in at least two cell types (**Figure 3j**; **Table S22-**  
181 **S29**); significant pathways were involved in the domains of immune response, inflammation,  
182 and cell survival and apoptosis. Several pathways associated with autoimmune disease (e.g.,  
183 rheumatoid arthritis) were significant in multiple cell types. The ribosomal pathway, which plays  
184 a role cell growth and cellular response to stress, was the most significantly enriched pathway  
185 across all five cell types. These results further support the effects of THC on functional domains  
186 in immune regulation that have also been associated with immunological disease, although the  
187 causality of these relationships is unknown.

188 Finally, we were interested in understanding how cannabinoid receptor genes co-expressed  
189 with other genes in each cell type following THC administration. As expected, *CNR2*, encoding  
190 for CBR2, was highly expressed in B cells, followed by NK cells, then CD8+ T-cells, and lowest  
191 in CD4+ T-cells (**Figure 4a**).<sup>50</sup> Little *CNR1* expression was detected in any of the cell types.  
192 *GPR55* (cannabinoid receptor 3<sup>51</sup>) showed the highest expression in CD4+ T-cells. We  
193 observed gene co-expression between *CNR2* and 84 and 74 genes in pre- and post-THC  
194 samples, respectively (**Table S30-S31**). The co-expressed genes in post-THC B cells were  
195 enriched on functional domains of immune processes, biological regulation, cell proliferation,  
196 signaling, and response to stimulus (**Figure 4b**).



197 In summary, our results from a well-controlled, within subject human study demonstrate  
198 transcriptomic regulation in distinct immune cells following administration of a single dose of  
199 THC. Our study design and analytical approach enabled the identification of common and cell-  
200 type specific DEGs regulated by THC. Subjective, behavioral and cognitive tests confirm that  
201 the dose of THC was relevant to but limited the confounding effects of other compounds in  
202 cannabis. The cell type-specific gene and co-expression patterns revealed by scRNA-seq  
203 showed little overlap across cell types, which would have been obscured by bulk RNA-seq  
204 analysis. Cell type-based DEGs, co-expression networks, and GSEA revealed important THC  
205 effects on immune function, cytokine production, signal transduction, and cell apoptosis and  
206 survival. The study provides a foundation for future studies of cell type-specific immunologic  
207 effects of cannabis and cannabinoid constituents. Studying the effects of chronic medicinal or  
208 recreational cannabinoid exposure or the effects in immune disorders (e.g., HIV) using our  
209 approach are also warranted. These findings highlight the complexity of cannabinoid effects on  
210 immune function and nuance of immune cell types that may have medical relevance.

211

## 212 **Methods**

213 The study was conducted at the Neurobiological Studies Unit (VA Connecticut Healthcare  
214 System, West Haven, CT) with the approval of the Institutional Review Boards at VA  
215 Connecticut and Yale University, and the Protocol Review Committee of the Department of  
216 Psychiatry, Yale University. The study was amended to include prospective measures  
217 addressing safety.

## 218 ***Participants***

219 Two healthy participants were recruited from the community by advertisements. Both  
220 participants were male, 21-year old, and of European American descent. Subjects were

221 informed about the potential for psychosis, anxiety, and panic. After obtaining informed consent,  
222 subjects underwent a structured psychiatric interview for DSM-III-R<sup>52</sup> and were carefully  
223 screened for any DSM-IV Axis I or Axis II lifetime psychiatric or substance abuse disorder  
224 (excluding nicotine) and family history of major Axis I disorder. The history provided by subjects  
225 was confirmed by a telephone interview conducted with an individual (spouse or family member)  
226 identified by the subject prior to screening. In order to avoid exposing cannabis-naïve individuals  
227 to a potentially addictive substance, only subjects who had been exposed to cannabis but did  
228 not meet lifetime criteria for a cannabis use disorder were included. Past month cannabis use  
229 was quantified using a time-line-follow-back approach. Finally, subjects underwent a general  
230 physical and neurologic examination, EKG, and laboratory tests (serum electrolytes, liver  
231 function tests, complete blood count with differential and urine toxicology). Subjects were  
232 instructed to refrain from caffeinated beverages, alcohol, and illicit drugs from 2 weeks prior to  
233 testing until study completion. Urine toxicology was conducted on the morning of each test day  
234 to rule out recent illicit drug use.

### 235 ***Procedure***

236 Subjects received 0.03mg/kg of THC, the principal active ingredient of cannabis.<sup>18,19</sup> This dose  
237 equivalent to 2.1 mg in a 70 kg individual has been shown in previous studies to produce effects  
238 consistent with the known effects of cannabis, in a safe manner.<sup>53-55</sup> THC was administered on  
239 its own, without the >450 other chemical constituents of cannabis because THC is the principal  
240 active constituent of cannabis and the other chemical constituents could render the results  
241 challenging to interpret. The intravenous route of administration was chosen to reduce inter and  
242 intraindividual variability in plasma THC levels with the inhaled route.<sup>56</sup> Timeline of behavioral  
243 assessment and blood draw is presented in **Figure S3**. Subjects were attended to by a research  
244 psychiatrist, a research nurse, and a research coordinator. Clear 'stopping rules' were  
245 determined a priori and rescue medication (lorazepam) was available if necessary. Medical

246 condition and psychiatric status of participants were monitored closely during and after THC  
247 challenging. Subjective and clinical ratings were repeatedly assessed.

#### 248 ***Medical and behavioral assessment***

249 Vital signs, Cannabis intoxication, Psychotic symptoms, Perceptual alteration, and Cognitive  
250 test battery were measured prior, during, and post THC infusion as illustrated in **Figure S3**.

#### 251 ***Single cell RNA sequencing in 10X Genomics platform***

252 PBMCs from pre-THC (N=2) and post-THC samples (N=2) from fresh whole blood were isolated  
253 at the same time using a standard protocol. The cells were washed twice with phosphate-  
254 buffered saline containing 0.04% bovine serum albumin, and the final cell concentration was  
255 adjusted to 1000 cells/mL for library preparation. 5000 cells/sample were prepared for single  
256 cell capture.

#### 257 ***Sequencing data processing and quality control***

258 We used the 10X Genomics Chromium Single Cell 3' v2.0 platform to prepare individually  
259 barcoded single-cell RNA-Seq libraries following the manufacturer's protocol. Library size was  
260 confirmed with Agilent Bioanalyzer High Sensitivity DNA assay (PN:5067-4626), Invitrogen  
261 dsDNA HS qubit assay to evaluate dsDNA quantity (PN: Q32854), and KAPA qPCR analysis  
262 (KAPA Biosystems LIB Quant Kit, Illumina/LC480, PN: KK4854) to evaluate the quantity of  
263 sequencable transcripts.

264 ***Flow Cell Preparation and Sequencing:*** Sample concentrations are normalized to 10 nM and  
265 loaded onto Illumina Rapid flow cell at a concentration that yields 150M passing filter clusters  
266 per lane. Samples are sequenced using paired-end sequencing on an Illumina HiSeq 2500  
267 according to Illumina protocols. The 8 bp index is read during an additional sequencing read

268 that automatically follows the completion of read 1. Data generated during sequencing runs are  
269 simultaneously transferred to the YCGA high-performance computing cluster. A positive control  
270 (prepared bacteriophage Phi X library) provided by Illumina is spiked into every lane at a  
271 concentration of 0.3% to monitor sequencing quality in real time.

272 *Data Analysis and Storage:* Signal intensities are converted to individual base calls during a run  
273 using the system's Real Time Analysis (RTA) software. Base calls are transferred from the  
274 machine's dedicated personal computer to the Yale High Performance Computing cluster via a  
275 1 Gigabit network mount for downstream analysis. Primary analysis - sample de-multiplexing  
276 and alignment to the human genome - is performed using Illumina's CASAVA 1.8.2 software  
277 suite. The Cell Ranger Single-Cell Software Suite (versions 2.0.0 and 2.1.0 for the discovery  
278 and validation patients respectively) were used to perform sample demultiplexing, barcode  
279 processing and single-cell gene counting (<http://10xgenomics.com/>). The gene-cell matrix was  
280 generated for the following analysis.

### 281 *Data normalization*

282 Only genes with at least one UMI count detected in at least one cell were retained for analysis  
283 Single cells were excluded when >10% of reads mapped to mitochondrial RNA to ensure that all  
284 of the single cells originated from nucleated cells. The cells with fewer than 370 expressed  
285 genes or possible doublet cells (>100,000 reads) were also discarded. Applying these three  
286 criteria resulted in retention of 21,430 genes and 15,973 single cells for downstream analysis.

287 Data normalization was performed using a standard protocol in Seurat.<sup>23</sup> An exploratory  
288 analysis showed cells clustered by each participant. Batch effects were then removed using an  
289 empirical Bayesian framework (ComBat function in R package sva) with the individual labeled  
290 as the random variable. The normalized data was dimensionally reduced in two dimensions  
291 using t-distributed stochastic neighbor embedding (t-SNE) with a perplexity parameter of 20 and

292 3000 iterations after an initial principle component analysis. The distance matrix of the single  
293 cells was computed with the output of tSNE and converted into a graph. Then, the graph was  
294 clustered with the `cluster_louvain` function in R package *igraph*, which implements the multi-  
295 level optimization of modularity algorithm for finding community structure.

### 296 *Cell type identification*

297 A gene set of the cell type markers in PBMC was manually curated from the literature. A binary  
298 cell type matrix with cell types as columns and genes as rows was generated with value 1  
299 representing a marker in a cell type and value 0 denoting non-markers for a cell type. The  
300 generalized linear model (GLM) was constructed by deciding on one vector, representing one  
301 cell type as response, of the binary matrix and corresponding gene expressions as explanatory  
302 variables in one cell. In details,  $Y = (y_{gc})_{G \times C}$  is the binary cell type matrix of  $G$  marker genes of  
303  $C$  cell types and  $X = (x_{gs})_{G \times S}$  is the gene expression matrix of  $G$  marker genes of  $S$  single cells.  
304 For the  $g^{th}$  gene,  $y_{gc} = 0$  or 1 denotes the cell type-specific gene indicator of  $c^{th}$  cell type and  
305  $x_{gs}$  denotes the gene expression of  $s^{th}$  single cell, where  $g = 1, \dots, G$ ,  $c = 1, \dots, C$ , and  $s =$   
306  $1, \dots, S$ . The linear probability model (LPM) was conducted for our study,  $y_c = \beta_{0cs} + \beta_{1cs}x_s +$   
307  $\epsilon_{cs}$ , where  $y_c = (y_{1c}, \dots, y_{Gc})^T$  and  $x_s = (x_{1s}, \dots, x_{Gs})^T$  are the columns of matrix  $Y$  and  $X$ ,  
308 represent binary cell type vector and single cell gene expression vector, respectively.  $\epsilon_{cs} =$   
309  $(\epsilon_{1cs}, \dots, \epsilon_{Gcs})^T$  is a random error vector, where  $\epsilon_{gcs} \sim N(0, \sigma^2)$ . The hypothesis of interest to be  
310 tested is  $H_{0cs}: \beta_{1cs} = 0$  vs  $H_{1cs}: \beta_{1cs} \neq 0$ . One statistical value (t value) and p value is obtained  
311 for each cell and cell type;  $t_{cs}$  and  $p_{cs}$  denote the test statistic value and P-value, respectively  
312 for the  $c^{th}$  cell type of  $s^{th}$  single cell.

313 We used the cutoff,  $p < p_0$  and t value  $> 0$  to assign one cell to one cell type, where  $p_0$  is a  
314 predefined cut-off value ( $p_0 = 0.01$  in this study). Then, the proportion of each assigned cell type

315 was calculated for every cluster. The dominant proportions are used to assign one cluster to  
316 one cell type.

$$P_c^k = \frac{\sum_{s \in S_k} (I(t_{cs} > 0) \cdot I(p_{cs} < p_0))}{N_k},$$

317 where  $P_c^k$  denotes the proportion of the  $c^{th}$  cell type in the  $k^{th}$  cluster.  $S_k$  is the set of cell indices  
318 for clustering  $k$ , with  $N_k = |S_k|$  being the total number of cells in the  $k^{th}$  cluster. Finally, the cell  
319 type for each cluster was confirmed manually by cell type marker gene expressions mapping on  
320 the 2D tSNE plot. The cell clusters mapping to the same cell type were merged for downstream  
321 analysis.

## 322 **Statistics**

323 All statistical analyses were performed using R version 3.5.1 (R Foundation, [https://www.r-](https://www.r-project.org)  
324 [project.org](https://www.r-project.org)) and RStudio version 1.1.453 (<https://www.rstudio.com>).

325 *Differential gene expression.* We applied a linear mixed regression model to identify genes  
326 associated with THC infusion. To control transcriptomic variation between two participants, we  
327 used participant as a random effect. Transcriptome-wide significance was set at false discovery  
328 rate (FDR) <0.05.

329 *Cell type-based gene-gene correlation analysis.* The relationship among genes in each given  
330 cell type was from KEGG database. We tested whether gene links in KEGG were significant in  
331 each cell type using linear regression model. Significant gene-gene correlation was set at  
332 FDR<0.05. The analysis was performed separately in pre-THC and post-THC samples to test if  
333 THC alters gene-gene correlation.

334 *Gene Ontology (GO) enrichment analysis.* Genes in each co-expression network in major cell  
335 types were tested the enrichment on GO terms using The DAVID Gene Functional Classification  
336 Tool.<sup>57</sup> Significant level was set at FDR <0.05.

337 *Cell type-based gene set enrichment analysis.* We separately analyzed gene set enrichment in  
338 each cell type using KEGG database. Differentially expressed genes in a given cell type with  
339 nominal  $p < 0.001$  were selected. Significant pathway was set at FDR <0.05.

340 *Co-expression of cannabinoid receptor genes with other genes:* Four cannabinoid receptor  
341 genes, *CNR1*, *CNR2*, *CPR18*, and *GPR55* were tested differential expression across seven  
342 major cell types using linear mixed regression model. Correlation of *CNR2* with other genes in  
343 B cells was performed in pre- and post-THC samples independently. Significant correlation was  
344 set at FDR <0.05.

#### 345 **Reporting summary**

346 Further information about study design, codes, and statistics are in the reporting summary.

#### 347 **Data availability.**

348 Single cell transcriptome data have been deposited in Gene Expression Omnibus and are  
349 available under project number GSE130228.

#### 350 **Acknowledgement**

351 This work was supported by the National Institute on Drug Abuse grants R01DA047820 (PI:  
352 Xu), R01DA047063 (PI: Xu), R01042691 (PI: Xu), and 1R21AA024257 (PI: D'Souza). Suhas  
353 Ganesh is partially supported by a NARSAD Young Investigator grant from the Brain and  
354 Behavior Research Foundation.

355 The authors thank Wenzhong Liu, Child Study Center at Yale University, Jaime Heltke, Guilin  
356 Wang, Christopher Castaldi at Yale Center of Genomic Analysis for supports of single cell RNA

357 sequencing. The Veterans Affairs Connecticut Healthcare System (VACHS), West Haven. The  
358 nurses (Angelina Genovese, Elizabeth O'Donnell and Margaret Dion-Marovitz) of the  
359 Neurobiological studies Unit, and the research pharmacist (Rachel Galvan) of VACHS.

#### 360 **Contributions**

361 K. Xu, Y. Hu, B. Aouizerat, D.C. D'Souza, J. H. Krystal designed the study and wrote the  
362 manuscript. Y. Hu, C. Shu, X. Liang, C. Yan, analyzed data. M. Ranganathan, S. Ganesh, and  
363 D.C. D'Souza were responsible for participant recruitment and THC infusion. All authors  
364 contributed to manuscript preparation.

#### 365 **Competing interests**

366 All co-authors except Dr. Krystal declare no completing interests

367 The following competing interests for John H. Krystal:

368 **RE: John H. Krystal, MD**

#### 369 **2019 Financial Disclosure**

370

#### 371 Consultant

372 Note: – The Individual Consultant Agreements listed below are less than \$10,000 per year

373 AstraZeneca Pharmaceuticals

374 Biogen, Idec, MA

375 Biomedisyn Corporation

376 Bionomics, Limited (Australia)

377 Boehringer Ingelheim International



- 378 Concert Pharmaceuticals, Inc.
- 379 Epiodyne, Inc.
- 380 Heptares Therapeutics, Limited (UK)
- 381 Janssen Research & Development
- 382 L.E.K. Consulting
- 383 Otsuka America Pharmaceutical, Inc.
- 384 Perception Neuroscience Holdings, Inc.
- 385 Spring Care, Inc.
- 386 Sunovion Pharmaceuticals, Inc.
- 387 Takeda Industries
- 388 Taisho Pharmaceutical Co., Ltd
- 389
- 390 Scientific Advisory Board
- 391 Bioasis Technologies, Inc.
- 392 Biohaven Pharmaceuticals
- 393 BioXcel Therapeutics, Inc. (Clinical Advisory Board)
- 394 Cadent Therapeutics (Clinical Advisory Board)
- 395 PsychoGenics, Inc.
- 396 Stanley Center for Psychiatric research at the Broad Institute of MIT and Harvard
- 397 Lohocla Research Corporation

398

399 Stock

400 ArRETT Neuroscience, Inc.

401 Biohaven Pharmaceuticals

402 Sage Pharmaceuticals

403 Spring Care, Inc.

404

405 Stock Options

406 Biohaven Pharmaceuticals Medical Sciences

407 BlackThorn Therapeutics, Inc.

408 Storm Biosciences, Inc.

409

410 Income Greater than \$10,000

411 Editorial Board

412 Editor - Biological Psychiatry

413 Patents and Inventions

414 1) Seibyl JP, Krystal JH, Charney DS. Dopamine and noradrenergic reuptake inhibitors in

415 treatment of schizophrenia. US Patent #:5,447,948. September 5, 1995

- 416 2) Vladimir, Coric, Krystal, John H, Sanacora, Gerard – Glutamate Modulating Agents in the  
417 Treatment of Mental Disorders US Patent No. 8,778,979 B2 Patent Issue Date: July 15, 2014.  
418 US Patent Application No. 15/695,164: Filing Date: 09/05/2017
- 419 3) Charney D, Krystal JH, Manji H, Matthew S, Zarate C., - Intranasal Administration of  
420 Ketamine to Treat Depression United States Application No. 14/197,767 filed on March 5, 2014;  
421 United States application or Patent Cooperation Treaty (PCT) International application No.  
422 14/306,382 filed on June 17, 2014
- 423 4): Zarate, C, Charney, DS, Manji, HK, Mathew, Sanjay J, Krystal, JH, Department of Veterans  
424 Affairs “Methods for Treating Suicidal Ideation”, Patent Application No. 14/197.767 filed on  
425 March 5, 2014 by Yale University Office of Cooperative Research
- 426 5) Arias A, Petrakis I, Krystal JH. – Composition and methods to treat addiction.  
427 Provisional Use Patent Application no.61/973/961. April 2, 2014. Filed by Yale University Office  
428 of Cooperative Research.
- 429 6): Chekroud, A., Gueorguieva, R., & Krystal, JH. “Treatment Selection for Major Depressive  
430 Disorder” [filing date 3rd June 2016, USPTO docket number Y0087.70116US00]. Provisional  
431 patent submission by Yale University
- 432 7) Gihyun, Yoon, Petrakis I, Krystal JH – Compounds, Compositions and Methods for Treating  
433 or Preventing Depression and Other Diseases. U. S. Provisional Patent Application No.  
434 62/444,552, filed on January 10, 2017 by Yale University Office of Cooperative Research OCR  
435 7088 US01
- 436 8) Abdallah, C, Krystal, JH, Duman, R, Sanacora, G. Combination Therapy for Treating or  
437 Preventing Depression or Other Mood Diseases. U.S. Provisional Patent Application No.

438 047162-7177P1 (00754) filed on August 20, 2018 by Yale University Office of Cooperative

439 Research OCR 7451 US01

440 NON-Federal Research Support

441 AstraZeneca Pharmaceuticals provides the drug, Saracatinib, for research related to NIAAA

442 grant "Center for Translational Neuroscience of Alcoholism [CTNA-4]

443

444

445

446

447

448

449

450

451

452

453

454

455

456

457

458

459

460

461

462

463

464

465 **Figure Legends**

466 **Figure 1 A flow chart illustrating the study design and data analysis strategy.**

467 a. Two participants were infused with delta-9-tetrahydrocannabinol (THC). Blood samples were  
468 drawn before and 70 minutes after THC infusion. Peripheral blood mononuclear cells (PBMC)  
469 were isolated from each sample and 5000 cells subjected to single cell RNA-seq using the 10X  
470 Genomics platform.

471 b. tSNE plot showing cell transcriptomic clusters of 15,973 PBMCs in four samples pre- and  
472 post-THC infusion: pre-THC-S1; 65: post-THC-S1; pre-THC-S2; and post-THC-S2. Cell number  
473 in each sample are presented. The plot indicates a batch effect by participants showing that cell  
474 clustered by two participants.

475 c. After removal of batch effects from two participants, 15,973 cells clustered into 21 groups by  
476 single cell transcriptomic profile.

477 d. Examples of differentially expressed marker genes in each cell cluster. The clusters with  
478 similar marker gene profiles in a given cell type were assigned to the same cell type: CD4+ T-  
479 cells Clu(2,3,8,13,15,16,19); IL7RCD4+ T-cells Clu(4); CD8+ T-cells Clu (1,7,18,20,21); B cells  
480 Clu(6,12,14); NK cells Clu(5) CD14+ monocytes Clu(10,17); FCGR3A monocytes Clu(9) DCs  
481 Clu(11).

482 e. Cell type identification by generalized linear modeling (GLM) cell mapping approach and  
483 tSNE plotting. A panel of reference genes for each cell type were selected from previously  
484 published studies. GLM tested the association of cell type and marker gene expression in each  
485 cell. Significance association is set at  $p < 0.02$  and  $t > 0$ . Each individual cell is assigned to a cell  
486 type based on the predominant proportion of marker genes in a given cell type. Small cell  
487 clusters are merged into the closest cell type in the tSNE plot. The cell mapping deconvolutes

488 cells to eight PBM cell types: CD4+ T-cells, ILR7+/CD4+ T-cells, CD8+ T-cells, B cells, natural  
489 killer cells, CD14+ monocytes, FCGR3A monocytes, and DCs.

490 f. Percentage of cell numbers from each sample in a given cell type: pre-THC-S1, post-THC-S1,  
491 pre-THC-S2, post-THC-S2.

492 **Figure 2 Single cell transcriptome profiling reveal gene expression affected by a single**  
493 **dose of delta-9-tetrahydrocannabinol**

494 a. Linear Mixed Regression analysis identified differential expression of genes affected by THC  
495 infusion in eight cell types of peripheral blood mononuclear cells: CD4+ T-cells, ILR7CD4+ T-  
496 cells, CD8+ T-cells, B cells, natural killer cells, CD14+ monocytes, FCGR3A monocytes, and  
497 DCs. Differentially expressed genes were identified by applying linear mixed modelling (false  
498 discovery rate, FDR<0.05). Each inset box denotes the number of up-regulated (right box) and  
499 down-regulated (left box) genes. No differentially expressed genes were found in DCs.

500 b. Number of differential expressed genes (DEGs) in six major cell types. X-axis represents  
501 DEGs in each cell type; Y-axis represents number of DEG. A total of 69 DEGs are shared in at  
502 least two cell types, while 225 DEGs are unique for individual cell type (FDR < 0.05). Among  
503 shared DEGs in multiple cell types, up(red)- or down(blue) -regulated genes by THC are in the  
504 same direction across cell types except three DEGs (purple).

505 c. Violin plots showing common differentially expressed genes between pre-THC and post-THC  
506 in at least three cell types. X-axis represents cell type; Y-axis represents expression level for  
507 each gene. Blue: pre-THC samples; pink: post-THC samples.

508 **Figure 3 Cell-type based differential gene expression, gene-gene correlation, and**  
509 **biological pathways influenced delta-9-tetrahydrocannabinol**

- 510 a. Heat map showing three subtypes of CD4+ T-cells affected by THC. Color bar represents  
511 log<sub>2</sub> fold change between post-THC and pre-THC samples. Each row represents significant  
512 genes for top 20 genes in each cell cluster. Cluster 8 shows a distinct pattern of differential gene  
513 expression from those observed in clusters 3 and 6. In cluster 8, nine genes encoding ribosomal  
514 protein are decreased in expression by THC.
- 515 b. Co-expression network in CD4+ T-cells. Genes with nominal  $p < 0.001$  from linear mixed  
516 regression model are selected to construct a co-expression network. Gene-gene links were  
517 derived from KEGG: Kyoto Encyclopedia of Genes and Genomes – GenomeNet. Significance is  
518 set at false discovery rate (FDR)  $< 0.05$ . A total of 40 nodes and 33 edges were observed. Two  
519 hub genes, *CCR7* and *HLA-A*, are differentially expressed genes influenced by THC.
- 520 c. Heat map showing three subgroups of CD8+ T-cells affected by THC. Cluster 20 shows  
521 distinct differential gene patterns from clusters 7 and 18.
- 522 d. Co-expression network in CD8+ T-cells. Genes with nominal  $p < 0.001$  in CD8+ T-cells are  
523 selected to construct a co-expression network. In CD8+ T-cells, we observed 35 nodes and 31  
524 edges. One hub gene, *HLA-A*, is differentially expressed by THC.
- 525 e. Heat map showing two subtypes of B cells affected by THC. Each row represents significant  
526 differentially expressed genes in B cells. Cluster 12 shows a distinct differential gene expression  
527 pattern from that of cluster 14.
- 528 f. Co-expression network in B cells. Genes with nominal  $p < 0.001$  in B cells are selected to  
529 construct a co-expression network. A total of 34 nodes and 28 edges are observed. Three hub  
530 genes, *HLA-A*, *HLA-DQA1*, and *HLA-DPA1* are identified.
- 531 g. Co-expression network in natural killer (NK) cells. We observe 17 nodes and 12 edges. One  
532 hub gene, *CCL4*, is significantly differentially expressed following THC infusion.

- 533 h. Heat map showing two distinct subtypes of CD14+ monocytes (cluster 10 and cluster 17)  
534 affected by THC. Color bar represents log2 fold change between pre-THC and post-THC  
535 samples. Each row represents significant genes in CD14+ monocytes.
- 536 i. Co-expression network in CD14+ monocytes. Genes with nominal  $p < 0.001$  in CD4+ T-cells  
537 are selected to construct a co-expression network. We observed 18 nodes and 13 edges. One  
538 hub gene, *HLA-DQB1*, was identified in both pre-THC and post-THC samples.
- 539 j. Circus plot showing gene set enrichment analysis using KEGG annotations reveal 39  
540 biological pathways shared in at least 2 cell types. KEGG: Kyoto Encyclopedia of Genes and  
541 Genomes – GenomeNet. Significant pathway is declared at false discovery rate (FDR) $< 0.05$ .  
542 The legend is the name of each pathway corresponding to each spoke of the circular plot.

#### 543 **Figure 4. THC receptor gene expression and co-expression network in B cells**

- 544 a. tSNE plot showing THC receptor gene expression in distinct cell types of peripheral blood  
545 mononuclear cells. *CNR1* is observed little expression in any cell types. *CNR2* is highly  
546 expressed in B cells, followed by nature killer cells, CD8+ T-cells, and minimally expressed in  
547 CD4+ T-cells. *GPR55* is highly expressed in CD4+ T-cells more than other cell types. *GPR18* is  
548 widely expressed in peripheral blood mononuclear cells.
- 549 b. *CNR2* expression is significantly correlated with 74 genes in B cells. The genes co-expressed  
550 with *CNR2* are involved in functions of biological regulation, cellular process, immune system  
551 process, metabolic process, and signal functions.

#### 552 **Supplementary Figures**

##### 553 **Figure S1. tSNE plot showing cell clusters after removed batch effects**

- 554 a. tSNE plot for four samples of pre- and post-THC infusion.
- 555 b. tSNE plot for pre-THC infusion of subject 1



556 c. tSNE plot for post-THC infusion of subject 1

557 d. tSNE plot for pre-THC infusion of subject 2

558 e. tSNE for post-THC infusion of subject 2.

559 **Figure S2. Sample marker gene expression in each cell type of 15,973 peripheral blood**  
560 **mononuclear cells**

561 **Figure S3. Study design and procedure of THC infusion in human subjects.**

562 SA: Substance Abuse; PANSS: Positive and Negative Syndrome Scale; CADSS: Clinician  
563 Administered Dissociative States Scale; VAS: Visual Analog Scale; IV: Intravenous Injection;  
564 EEG: electroencephalogram.

565  
566 **Supplementary Tables**

567  
568  
569 **Table S1.** Cell markers for cell type identification

570  
571 **Table S2.** Mapping cell types using generalized linear modelling

572  
573 **Table S3.** Proportion of cell numbers for each sample in a given cell type

574  
575 **Table S4.** A summary of the number of differentially expressed genes between post- and pre-  
576 THC samples in each cell type

577  
578 **Table S5.** Differentially expressed genes affected by THC in CD4+ T-cells

579  
580 **Table S6.** Differentially expressed genes affected by THC in IL7RCD4+ T-cells

581  
582 **Table S7.** Differentially expressed genes affected by THC in CD8+ T-cells

583  
584 **Table S8.** Differentially expressed genes affected by THC in B cells

585  
586 **Table S9.** Differentially expressed genes affected by THC in natural killer cells

587  
588 **Table S10.** Differentially expressed genes affected by THC in CD14+ monocytes

589  
590 **Table S11.** Differentially expressed genes affected by THC in FCGR3A monocytes

591  
592 **Table S12.** log<sub>2</sub> fold change of top 20 genes between post- and pre-THC infusion in each CD4+  
593 T-cell clusters

594  
595 **Table S13.** log2 fold change of top 20 genes between post- and pre-THC infusion in each CD8+  
596 T-cell clusters  
597  
598 **Table S14.** log2 fold change of top 20 genes between post- and pre-THC infusion in each B cell  
599 clusters  
600  
601 **Table S15.** log2 fold change of top 20 genes between post- and pre-THC infusion in each  
602 CD14+ monocytes clusters  
603  
604 **Table S16.** Gene Ontology (GO) term enrichment for the co-expression network in CD4+ T-cells  
605  
606 **Table S17.** Gene Ontology (GO) term enrichment for the co-expression network in CD8+ T-cells  
607  
608 **Table S18.** Gene Ontology (GO) term enrichment for the co-expression network in B cells  
609  
610 **Table S19.** Gene Ontology (GO) term enrichment for the co-expression network in natural killer  
611 cells  
612  
613 **Table S20.** Gene Ontology (GO) term enrichment for the co-expression network in CD14+  
614 monocytes  
615  
616 **Table S21.** Gene Ontology (GO) term enrichment for the co-expression network in FCGR3A  
617 monocytes  
618  
619 **Table S22.** A summary of the number of significant pathway in each cell type  
620  
621 **Table S23.** Significant pathways from KEGG in CD4+ T-cells  
622  
623 **Table S24.** Significant pathways from KEGG in IL7RCD4+ T-cells  
624  
625 **Table S25.** Significant pathways from KEGG in CD8+ T-cells  
626  
627 **Table S26.** Significant pathways from KEGG in B cells  
628  
629 **Table S27.** Significant pathways from KEGG in natural killer cells  
630  
631 **Table S28.** Significant pathways from KEGG in CD14+ monocytes  
632  
633 **Table S29.** Significant pathways from KEGG in FCGR3A monocytes  
634  
635 **Table S30.** Pre-THC gene co-expression between *CNR2* and other genes  
636  
637 **Table S31.** Post-THC gene co-expression between *CNR2* and other genes  
638  
639  
640

641  
642  
643

## References

- 644 1. Katz-Talmor, D., Katz, I., Porat-Katz, B.S. & Shoenfeld, Y. Cannabinoids for the  
645 treatment of rheumatic diseases - where do we stand? *Nat Rev Rheumatol* **14**, 488-498  
646 (2018).
- 647 2. Maccarrone, M. *et al.* Endocannabinoid signaling at the periphery: 50 years after THC.  
648 *Trends Pharmacol Sci* **36**, 277-96 (2015).
- 649 3. Tanasescu, R. & Constantinescu, C.S. Cannabinoids and the immune system: an  
650 overview. *Immunobiology* **215**, 588-97 (2010).
- 651 4. Mackie, K. Cannabinoid receptors as therapeutic targets. *Annu Rev Pharmacol Toxicol*  
652 **46**, 101-22 (2006).
- 653 5. Condie, R., Herring, A., Koh, W.S., Lee, M. & Kaminski, N.E. Cannabinoid inhibition of  
654 adenylate cyclase-mediated signal transduction and interleukin 2 (IL-2) expression in the  
655 murine T-cell line, EL4.IL-2. *J Biol Chem* **271**, 13175-83 (1996).
- 656 6. Turcotte, C., Blanchet, M.R., Laviolette, M. & Flamand, N. The CB2 receptor and its role  
657 as a regulator of inflammation. *Cell Mol Life Sci* **73**, 4449-4470 (2016).
- 658 7. Nahas, G.G., Zagury, D., Schwartz, I.W. & Nagel, M.D. Evidence for the possible  
659 immunogenicity of delta 9-tetrahydrocannabinol (THC) in rodents. *Nature* **243**, 407-8  
660 (1973).
- 661 8. Croxford, J.L. & Yamamura, T. Cannabinoids and the immune system: potential for the  
662 treatment of inflammatory diseases? *J Neuroimmunol* **166**, 3-18 (2005).
- 663 9. Nahas, G.G., Morishima, A. & Desoize, B. Effects of cannabinoids on macromolecular  
664 synthesis and replication of cultured lymphocytes. *Fed Proc* **36**, 1748-52 (1977).

- 665 10. McKallip, R.J., Nagarkatti, M. & Nagarkatti, P.S. Delta-9-tetrahydrocannabinol enhances  
666 breast cancer growth and metastasis by suppression of the antitumor immune response.  
667 *J Immunol* **174**, 3281-9 (2005).
- 668 11. Yuan, M. *et al.* Delta 9-Tetrahydrocannabinol regulates Th1/Th2 cytokine balance in  
669 activated human T cells. *J Neuroimmunol* **133**, 124-31 (2002).
- 670 12. Herrera, B. *et al.* The CB2 cannabinoid receptor signals apoptosis via ceramide-  
671 dependent activation of the mitochondrial intrinsic pathway. *Exp Cell Res* **312**, 2121-31  
672 (2006).
- 673 13. Jia, W. *et al.* Delta9-tetrahydrocannabinol-induced apoptosis in Jurkat leukemia T cells is  
674 regulated by translocation of Bad to mitochondria. *Mol Cancer Res* **4**, 549-62 (2006).
- 675 14. Shalek, A.K. *et al.* Single-cell transcriptomics reveals bimodality in expression and  
676 splicing in immune cells. *Nature* **498**, 236-40 (2013).
- 677 15. Wills, Q.F. *et al.* Single-cell gene expression analysis reveals genetic associations  
678 masked in whole-tissue experiments. *Nat Biotechnol* **31**, 748-52 (2013).
- 679 16. Stubbington, M.J.T., Rozenblatt-Rosen, O., Regev, A. & Teichmann, S.A. Single-cell  
680 transcriptomics to explore the immune system in health and disease. *Science* **358**, 58-63  
681 (2017).
- 682 17. Mathys, H. *et al.* Single-cell transcriptomic analysis of Alzheimer's disease. *Nature*  
683 (2019).
- 684 18. D'Souza, D.C. *et al.* The Psychotomimetic Effects of Intravenous Delta-9-  
685 Tetrahydrocannabinol in Healthy Individuals: Implications for Psychosis.  
686 *Neuropsychopharmacology* **29**, 1558 (2004).
- 687 19. Carbuto, M. *et al.* The safety of studies with intravenous Delta(9)-tetrahydrocannabinol in  
688 humans, with case histories. *Psychopharmacology (Berl)* **219**, 885-96 (2012).

- 689 20. Boggs, D.L. *et al.* The dose-dependent psychomotor effects of intravenous delta-9-  
690 tetrahydrocannabinol (Delta(9)-THC) in humans. *J Psychopharmacol* **32**, 1308-1318  
691 (2018).
- 692 21. Sherif, M., Radhakrishnan, R., D'Souza, D.C. & Ranganathan, M. Human Laboratory  
693 Studies on Cannabinoids and Psychosis. *Biol Psychiatry* **79**, 526-38 (2016).
- 694 22. Zheng, G.X. *et al.* Massively parallel digital transcriptional profiling of single cells. *Nat*  
695 *Commun* **8**, 14049 (2017).
- 696 23. Butler, A., Hoffman, P., Smibert, P., Papalexi, E. & Satija, R. Integrating single-cell  
697 transcriptomic data across different conditions, technologies, and species. *Nature*  
698 *Biotechnology* **36**, 411 (2018).
- 699 24. Leek, J.T. & Storey, J.D. Capturing heterogeneity in gene expression studies by  
700 surrogate variable analysis. *PLoS Genet* **3**, 1724-35 (2007).
- 701 25. Schelker, M. *et al.* Estimation of immune cell content in tumour tissue using single-cell  
702 RNA-seq data. *Nat Commun* **8**, 2032 (2017).
- 703 26. Gebhardt, C., Nemeth, J., Angel, P. & Hess, J. S100A8 and S100A9 in inflammation and  
704 cancer. *Biochem Pharmacol* **72**, 1622-31 (2006).
- 705 27. Riva, M. *et al.* Induction of nuclear factor-kappaB responses by the S100A9 protein is  
706 Toll-like receptor-4-dependent. *Immunology* **137**, 172-82 (2012).
- 707 28. Champaiboon, C., Sappington, K.J., Guenther, B.D., Ross, K.F. & Herzberg, M.C.  
708 Calprotectin S100A9 calcium-binding loops I and II are essential for keratinocyte  
709 resistance to bacterial invasion. *J Biol Chem* **284**, 7078-90 (2009).
- 710 29. Tewary, P. *et al.* Granulysin activates antigen-presenting cells through TLR4 and acts as  
711 an immune alarmin. *Blood* **116**, 3465-74 (2010).
- 712 30. El-Gohary, M. & Eid, M.A. Effect of cannabinoid ingestion (in the form of bhang) on the  
713 immune system of high school and university students. *Hum Exp Toxicol* **23**, 149-56  
714 (2004).

- 715 31. Eisenstein, T.K., Meissler, J.J., Wilson, Q., Gaughan, J.P. & Adler, M.W. Anandamide  
716 and Delta9-tetrahydrocannabinol directly inhibit cells of the immune system via CB2  
717 receptors. *J Neuroimmunol* **189**, 17-22 (2007).
- 718 32. Lu, T., Newton, C., Perkins, I., Friedman, H. & Klein, T.W. Cannabinoid treatment  
719 suppresses the T-helper cell-polarizing function of mouse dendritic cells stimulated with  
720 *Legionella pneumophila* infection. *J Pharmacol Exp Ther* **319**, 269-76 (2006).
- 721 33. Massi, P., Vaccani, A. & Parolaro, D. Cannabinoids, immune system and cytokine  
722 network. *Curr Pharm Des* **12**, 3135-46 (2006).
- 723 34. Winkler, G.S. The mammalian anti-proliferative BTG/Tob protein family. *J Cell Physiol*  
724 **222**, 66-72 (2010).
- 725 35. Sofer, A., Lei, K., Johannessen, C.M. & Ellisen, L.W. Regulation of mTOR and cell  
726 growth in response to energy stress by REDD1. *Mol Cell Biol* **25**, 5834-45 (2005).
- 727 36. Zhang, X. *et al.* Thymosin beta 10 is a key regulator of tumorigenesis and metastasis  
728 and a novel serum marker in breast cancer. *Breast Cancer Res* **19**, 15 (2017).
- 729 37. Tabb-Massey, A. *et al.* Ribosomal proteins Rps0 and Rps21 of *Saccharomyces*  
730 *cerevisiae* have overlapping functions in the maturation of the 3' end of 18S rRNA.  
731 *Nucleic Acids Res* **31**, 6798-805 (2003).
- 732 38. Wang, A. *et al.* Ribosomal protein RPL41 induces rapid degradation of ATF4, a  
733 transcription factor critical for tumour cell survival in stress. *J Pathol* **225**, 285-92 (2011).
- 734 39. Kanehisa, M. & Goto, S. KEGG: kyoto encyclopedia of genes and genomes. *Nucleic*  
735 *Acids Res* **28**, 27-30 (2000).
- 736 40. Zhu, W., Newton, C., Daaka, Y., Friedman, H. & Klein, T.W. delta 9-  
737 Tetrahydrocannabinol enhances the secretion of interleukin 1 from endotoxin-stimulated  
738 macrophages. *J Pharmacol Exp Ther* **270**, 1334-9 (1994).
- 739 41. Albig, W. *et al.* The human replacement histone H3.3B gene (H3F3B). *Genomics* **30**,  
740 264-72 (1995).

- 741 42. Li, C. *et al.* Mutational landscape of primary, metastatic, and recurrent ovarian cancer  
742 reveals c-MYC gains as potential target for BET inhibitors. *Proc Natl Acad Sci U S A*  
743 **116**, 619-624 (2019).
- 744 43. Kim, D.H. *et al.* Intracellular interleukin-32gamma mediates antiviral activity of cytokines  
745 against hepatitis B virus. *Nat Commun* **9**, 3284 (2018).
- 746 44. Yoshimura, A., Suzuki, M., Sakaguchi, R., Hanada, T. & Yasukawa, H. SOCS,  
747 Inflammation, and Autoimmunity. *Front Immunol* **3**, 20 (2012).
- 748 45. Mamane, Y. *et al.* Interferon regulatory factors: the next generation. *Gene* **237**, 1-14  
749 (1999).
- 750 46. Shirasawa, T. *et al.* A novel gene product associated with mu chains in immature B cells.  
751 *EMBO J* **12**, 1827-34 (1993).
- 752 47. Toutenhoofd, S.L. *et al.* Characterization of the human CALM2 calmodulin gene and  
753 comparison of the transcriptional activity of CALM1, CALM2 and CALM3. *Cell Calcium*  
754 **23**, 323-38 (1998).
- 755 48. Divanovic, S. *et al.* Negative regulation of Toll-like receptor 4 signaling by the Toll-like  
756 receptor homolog RP105. *Nat Immunol* **6**, 571-8 (2005).
- 757 49. Shah, S., King, E.M., Chandrasekhar, A. & Newton, R. Roles for the mitogen-activated  
758 protein kinase (MAPK) phosphatase, DUSP1, in feedback control of inflammatory gene  
759 expression and repression by dexamethasone. *J Biol Chem* **289**, 13667-79 (2014).
- 760 50. Lee, S.F., Newton, C., Widen, R., Friedman, H. & Klein, T.W. Differential expression of  
761 cannabinoid CB(2) receptor mRNA in mouse immune cell subpopulations and following  
762 B cell stimulation. *Eur J Pharmacol* **423**, 235-41 (2001).
- 763 51. Lauckner, J.E. *et al.* GPR55 is a cannabinoid receptor that increases intracellular  
764 calcium and inhibits M current. *Proc Natl Acad Sci U S A* **105**, 2699-704 (2008).
- 765 52. Spitzer, R.L., Davies, M. & Barkley, R.A. The DSM-III-R field trial of disruptive behavior  
766 disorders. *J Am Acad Child Adolesc Psychiatry* **29**, 690-7 (1990).

- 767 53. Agurell, S. *et al.* Pharmacokinetics and metabolism of delta 1-tetrahydrocannabinol and  
768 other cannabinoids with emphasis on man. *Pharmacol Rev* **38**, 21-43 (1986).
- 769 54. Volkow, N.D., Fowler, J.S., Wolf, A.P. & Gillespi, H. Metabolic studies of drugs of abuse.  
770 *NIDA Res Monogr* **105**, 47-53 (1990).
- 771 55. Volkow, N.D. *et al.* Brain glucose metabolism in chronic marijuana users at baseline and  
772 during marijuana intoxication. *Psychiatry Res* **67**, 29-38 (1996).
- 773 56. Azorlosa, J.L., Heishman, S.J., Stitzer, M.L. & Mahaffey, J.M. Marijuana smoking: effect  
774 of varying delta 9-tetrahydrocannabinol content and number of puffs. *J Pharmacol Exp*  
775 *Ther* **261**, 114-22 (1992).
- 776 57. Huang, D.W. *et al.* The DAVID Gene Functional Classification Tool: a novel biological  
777 module-centric algorithm to functionally analyze large gene lists. *Genome Biol* **8**, R183  
778 (2007).

779



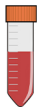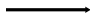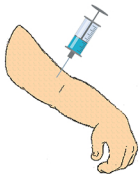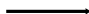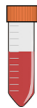

Draw blood before THC infusion

THC infusion

Draw blood after THC infusion

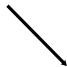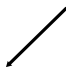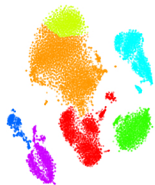

Single cell RNA-seq and cell type identification

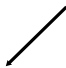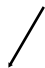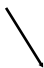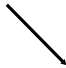

Differential gene expression analysis

Coexpression gene analysis by cell type

Gene set enrichment analysis by cell type

*CNR2* coexpression analysis in B cells

**Figure 1a**

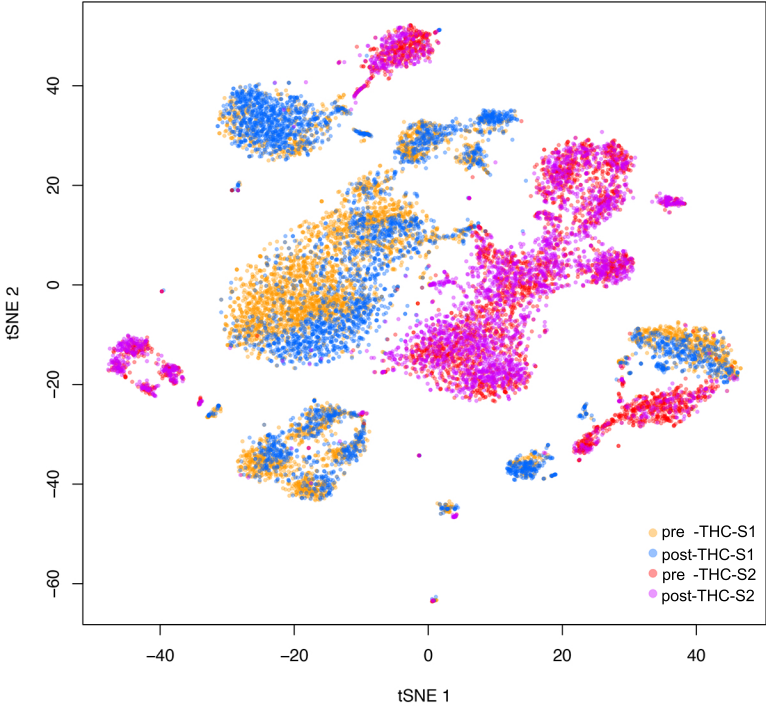

**Figure 1b**

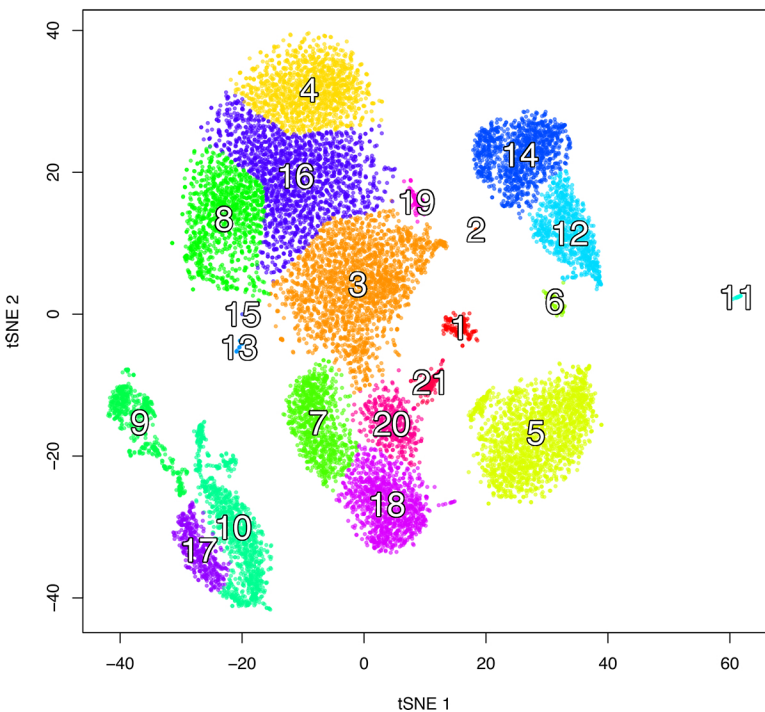

**Figure 1c**

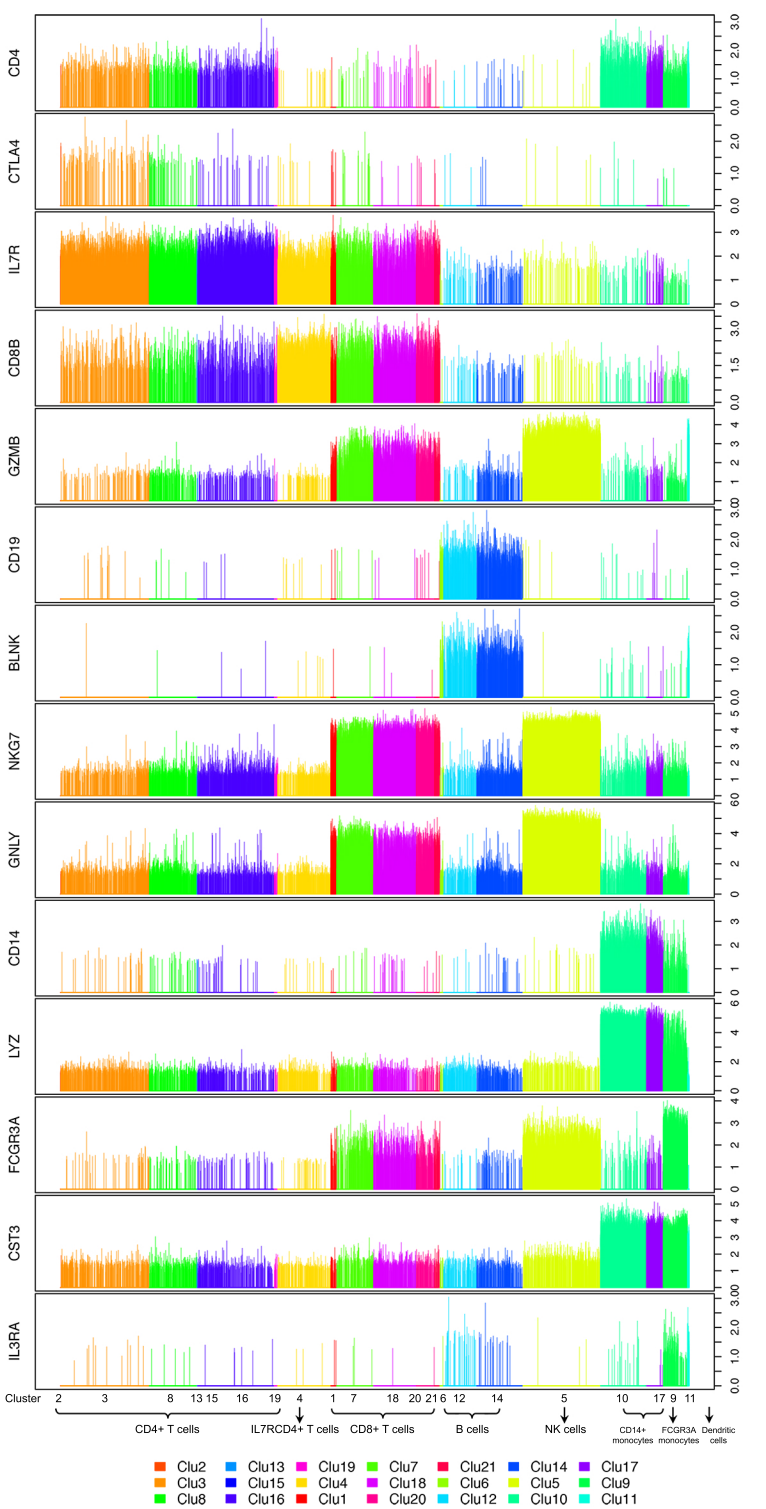

**Figure 1d**

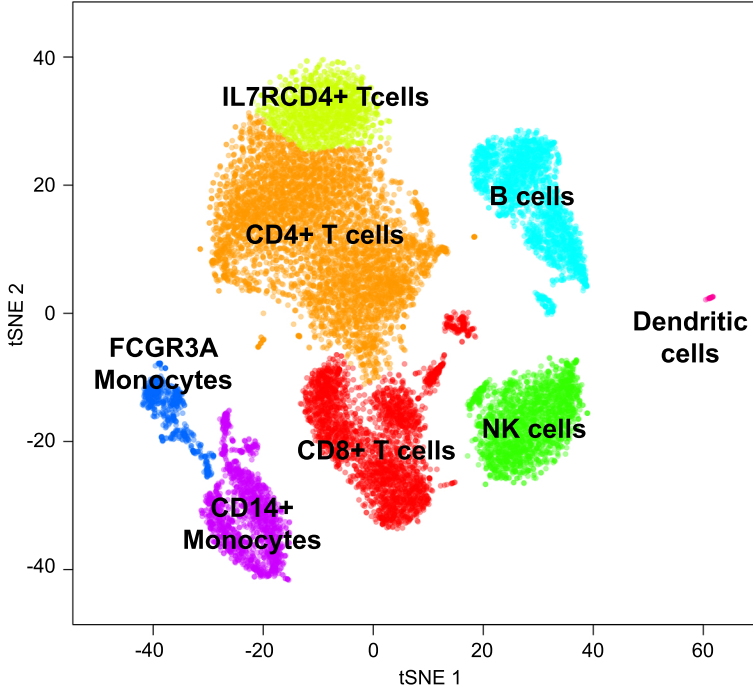

**Figure 1e**

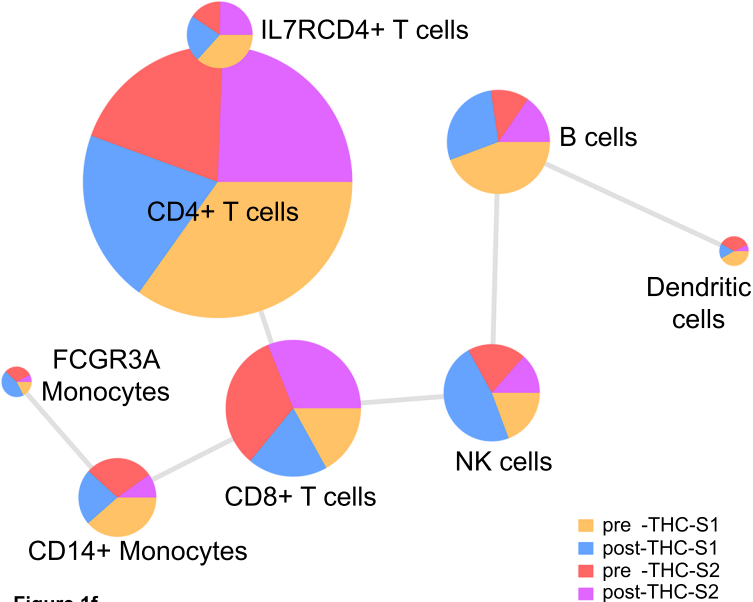

**Figure 1f**

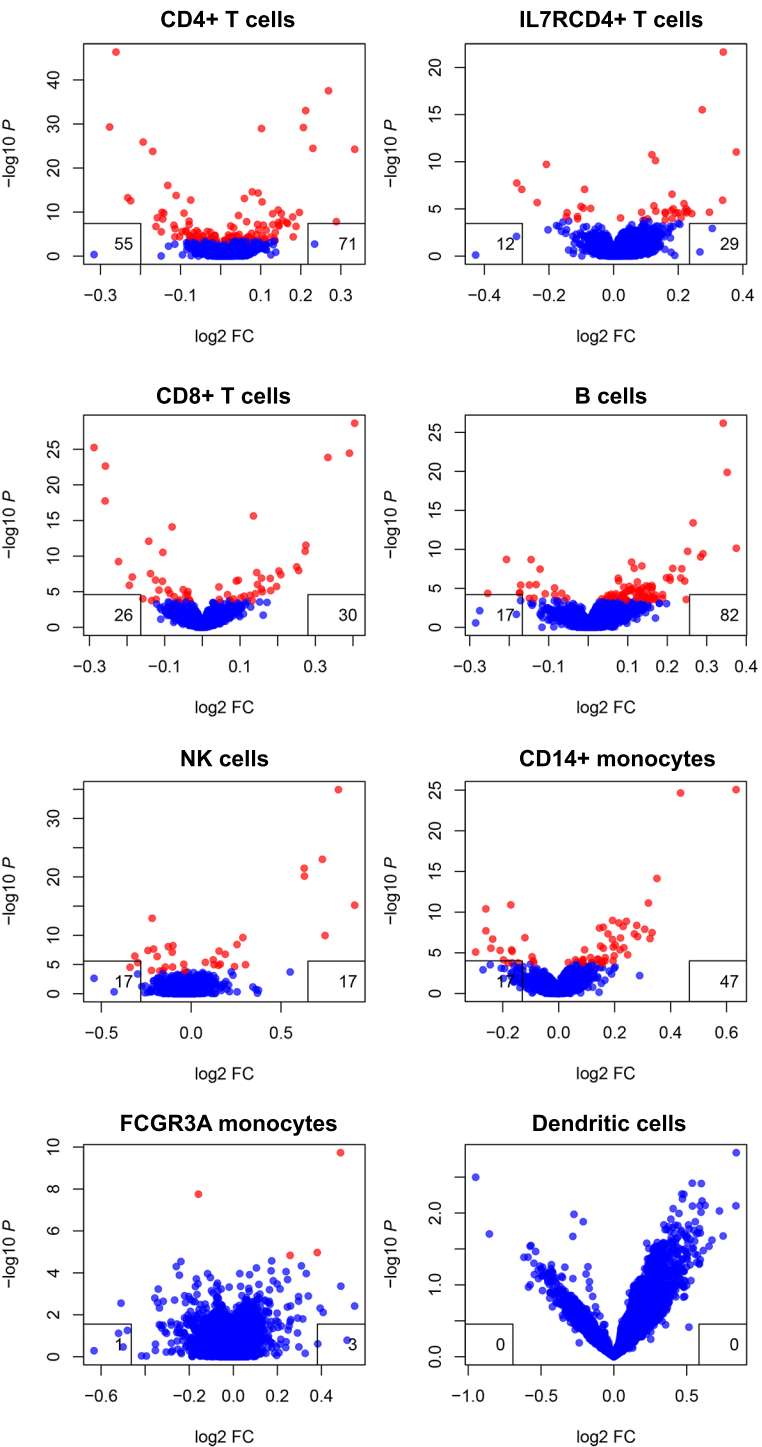

**Figure 2a**

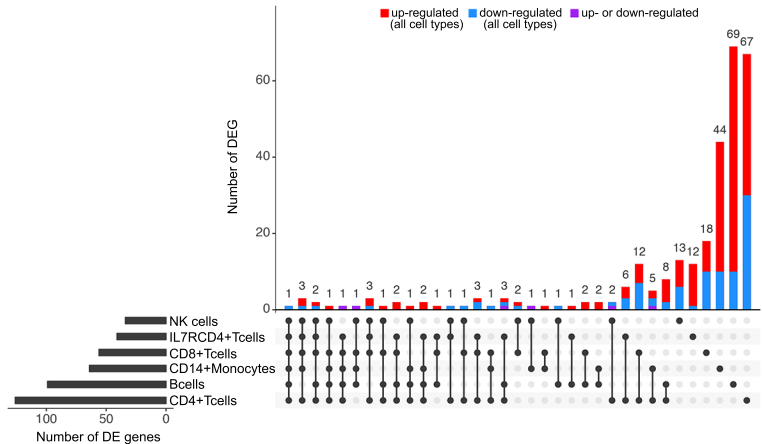

**Figure 2b**



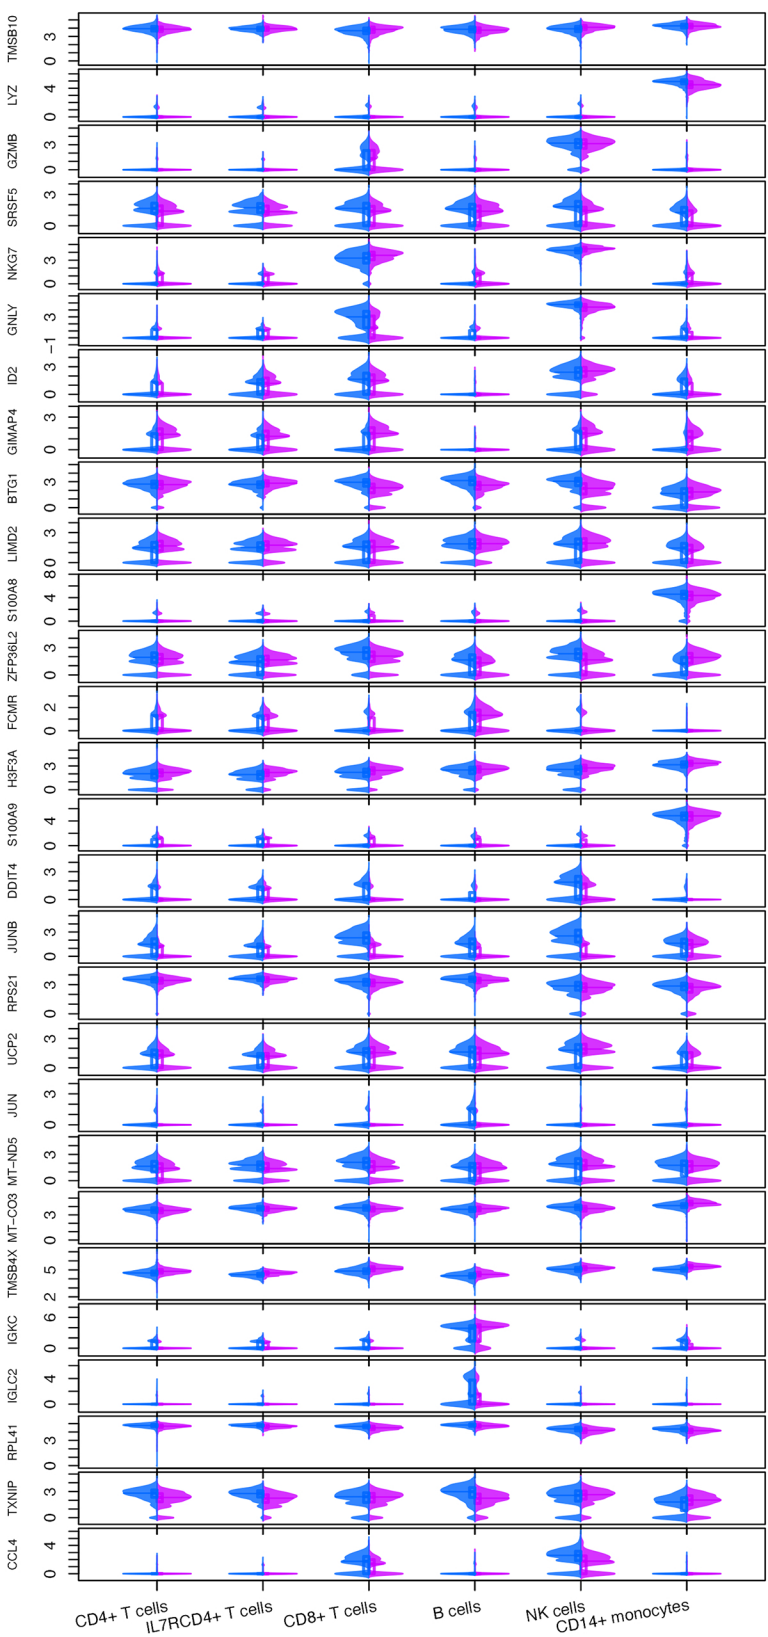

**Figure 2c**

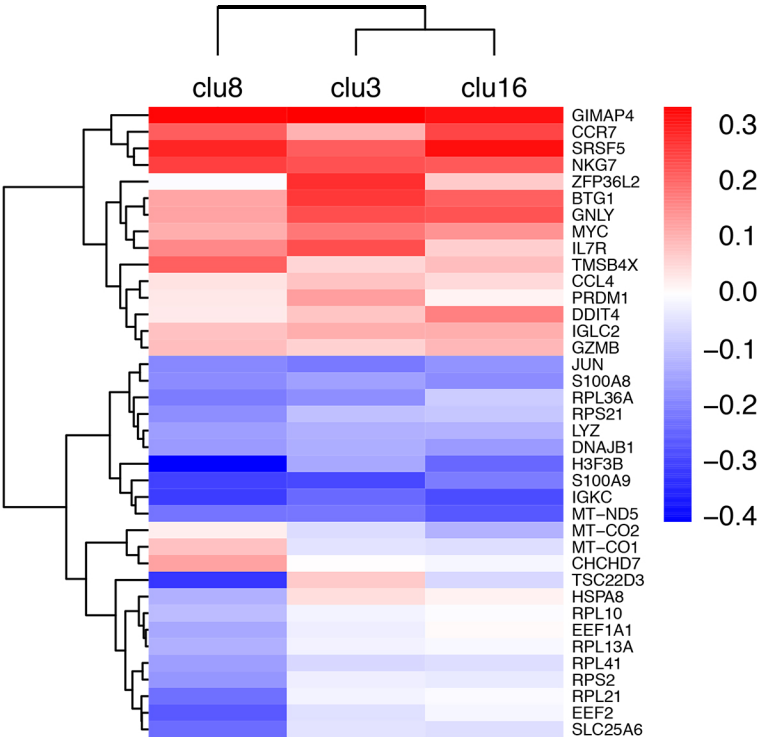

Figure 3a



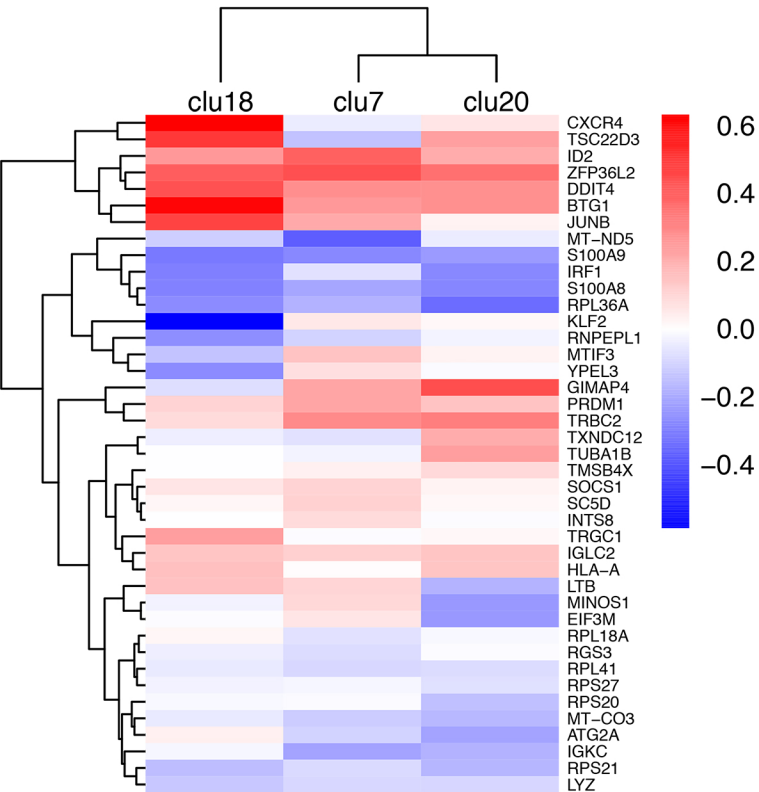

Figure 3c

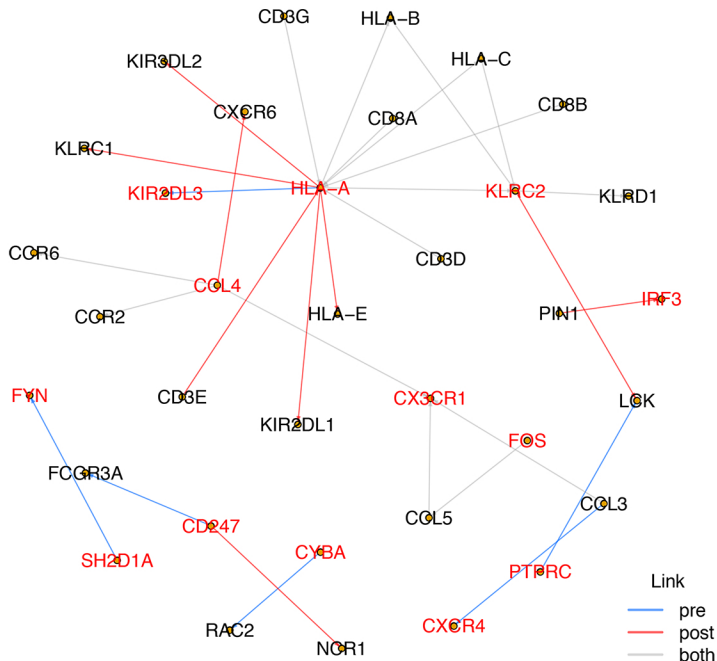

Figure 3d

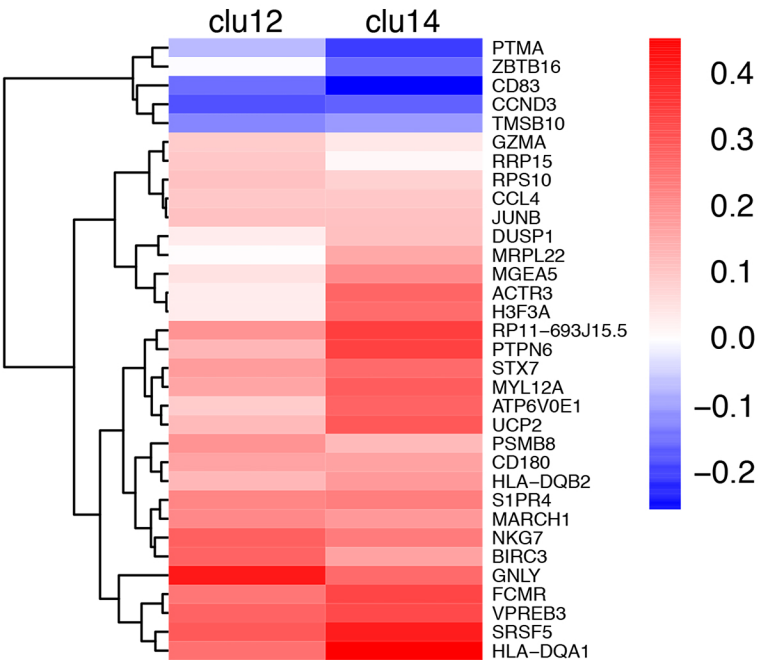

Figure 3e



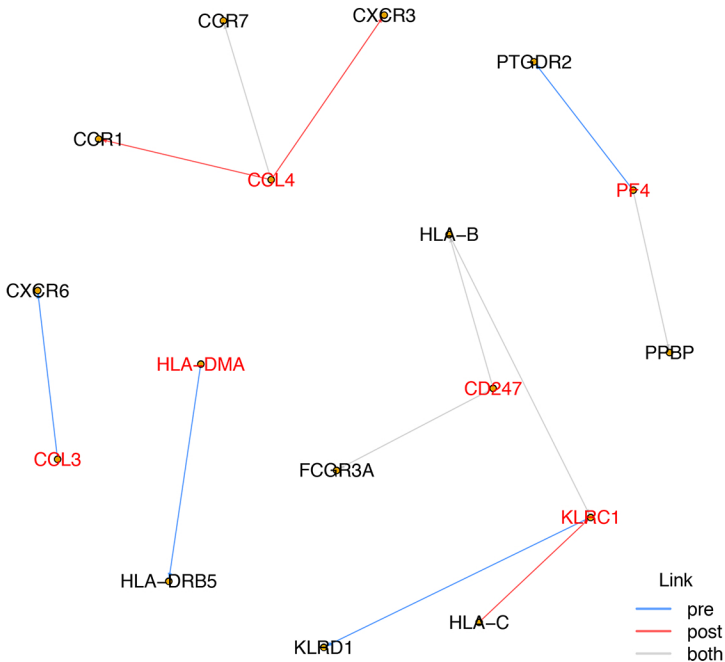

Figure 3g



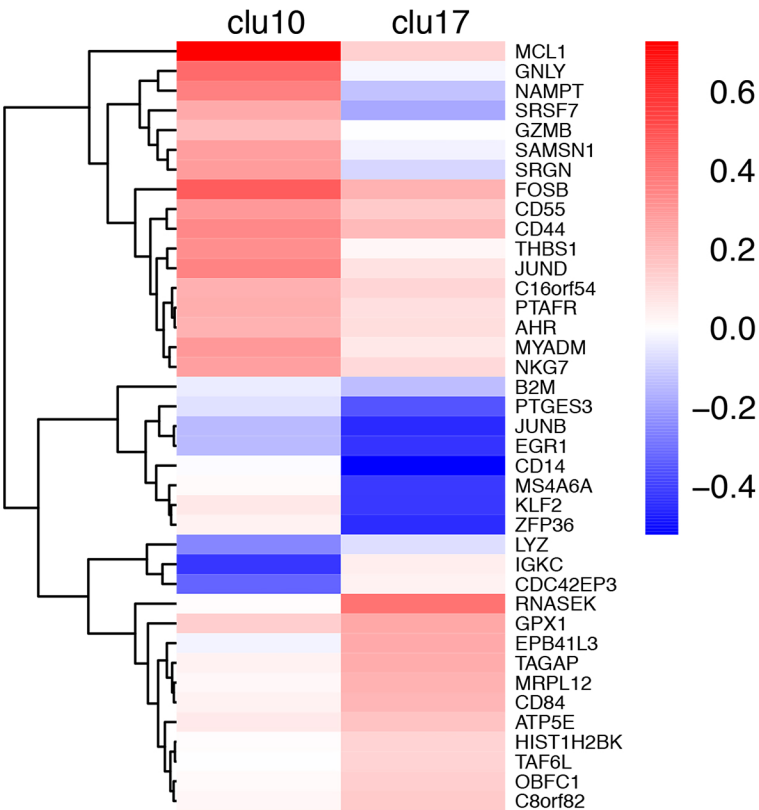

Figure 3h

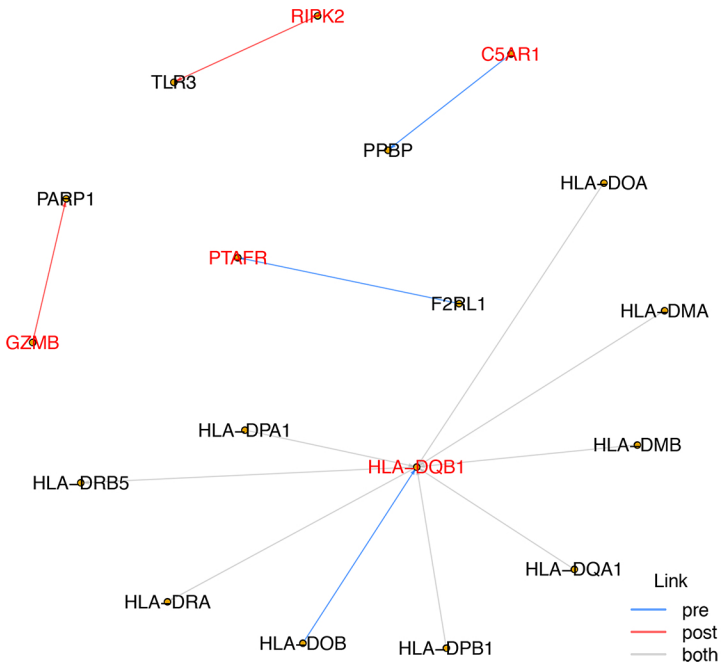

Figure 3i

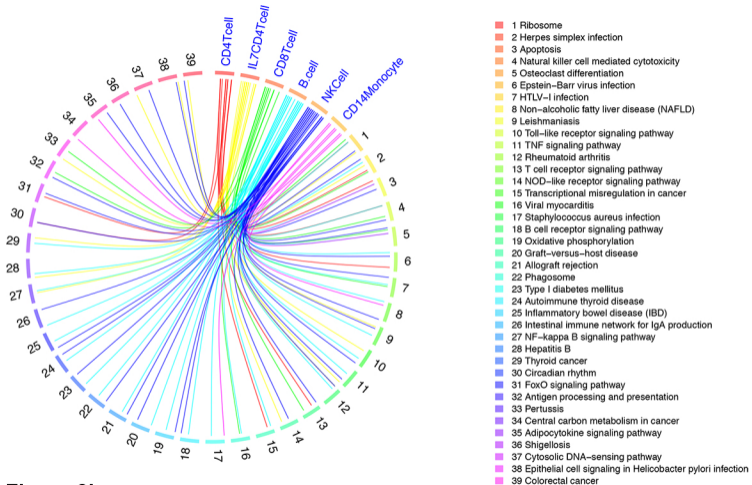

**Figure 3j**

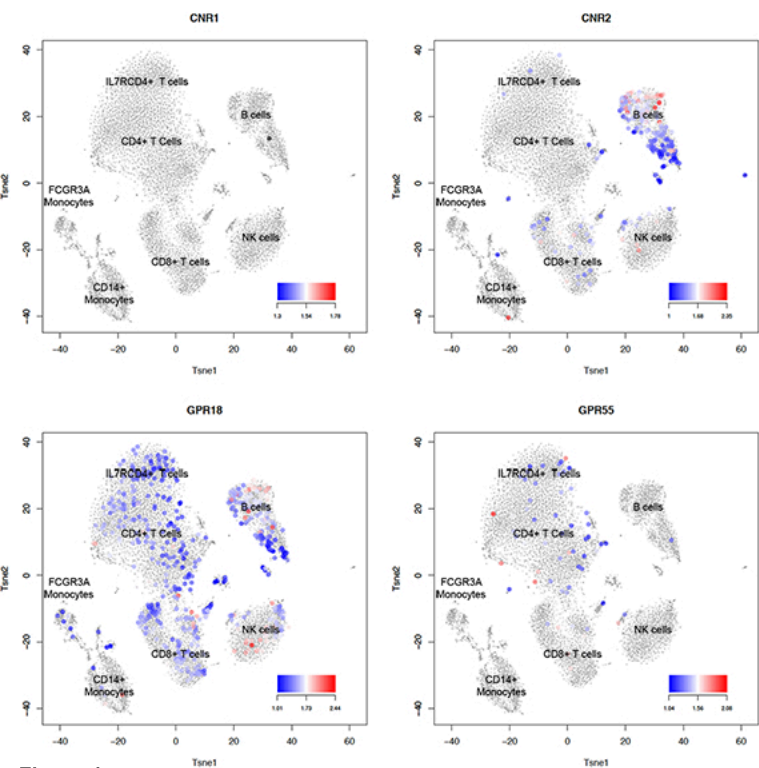

Figure 4a

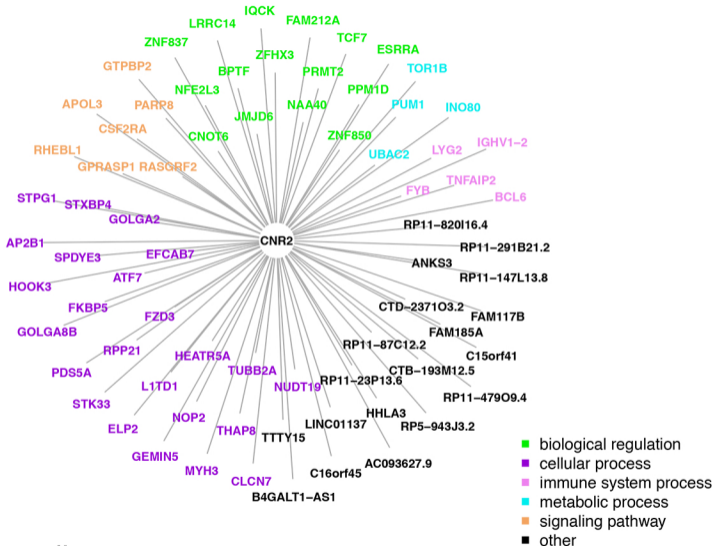

**Figure 4b**
